# Supplementary material for: Genetic Diversity and Population Structure of Chinese Chestnut (Castanea mollissima Blume) Cultivars Revealed by GBS Resequencing
Source: MDPI journal article supplement (doi:10.3390/plants11243524), 2022-12-14
Supplement: s1 [file s1]

**Supplementary Materials:** The following supporting information can be downloaded at: [www.mdpi.com/xxx/s1](http://www.mdpi.com/xxx/s1), Table S1. Source information and ADMIXTURE results ( $k = 2$ ) of 185 Chinese Chestnut landraces; Table S2. Outliers of the phylogenetic analysis; Figure S1. K values in the ADMIXTURE analysis of 185 Chinese chestnut landraces.

*Supplementary Table S1.* Source information and ADMIXTURE results ( $k=2$ ) of 185 Chinese Chestnut landraces.

**Table S1.** Source information and ADMIXTURE results ( $k=2$ ) of 185 Chinese Chestnut landraces.

| Sample No. | Clustering based on ADMIXTURE | Grouping based on sources | North–South division based on sources | Origin             |
|------------|-------------------------------|---------------------------|---------------------------------------|--------------------|
| RISF-10    | 1                             | North of the Yellow River | North of the Yellow River             | Changping, Beijing |
| RISF-11    | 1                             | North of the Yellow River | North of the Yellow River             | Changping, Beijing |
| RISF-12    | 1                             | North of the Yellow River | North of the Yellow River             | Huairou, Beijing   |
| RISF-13    | 1                             | North of the Yellow River | North of the Yellow River             | Huairou, Beijing   |
| RISF-14    | 1                             | North of the Yellow River | North of the Yellow River             | Huairou, Beijing   |
| RISF-15    | 1                             | North of the Yellow River | North of the Yellow River             | Changli, Hebei     |
| RISF-17    | 1                             | North of the Yellow River | North of the Yellow River             | Qian'an, Hebei     |
| RISF-18    | 1                             | North of the Yellow River | North of the Yellow River             | Qian'an, Hebei     |
| RISF-19    | 1                             | North of the Yellow River | North of the Yellow River             | Qian'an, Hebei     |
| RISF-21    | 1                             | North of the Yellow River | North of the Yellow River             | Zunhua, Hebei      |
| RISF-22    | 1                             | North of the Yellow River | North of the Yellow River             | Zunhua, Hebei      |
| RISF-23    | 1                             | North of the Yellow River | North of the Yellow River             | Zunhua, Hebei      |
| RISF-128   | 1                             | North of the Yellow River | North of the Yellow River             | Huairou, Beijing   |
| RISF-129   | 1                             | North of the Yellow River | North of the Yellow River             | Huairou, Beijing   |
| RISF-130   | 1                             | North of the Yellow River | North of the Yellow River             | Miyun, Beijing     |
| RISF-133   | 1                             | North of the Yellow River | North of the Yellow River             | Zunhua, Hebei      |
| RISF-134   | 1                             | North of the Yellow River | North of the Yellow River             | Zunhua, Hebei      |
| RISF-135   | 1                             | North of the Yellow River | North of the Yellow River             | Huairou, Beijing   |
| RISF-136   | 1                             | North of the Yellow River | North of the Yellow River             | Zunhua, Hebei      |
| RISF-138   | 1                             | North of the Yellow River | North of the Yellow River             | Zunhua, Hebei      |
| RISF-139   | 1                             | North of the Yellow River | North of the Yellow River             | Huairou, Beijing   |
| RISF-140   | 1                             | North of the Yellow River | North of the Yellow River             | Yanshan, Hebei     |
| RISF-141   | 1                             | North of the Yellow River | North of the Yellow River             | Huairou, Beijing   |
| RISF-146   | 1                             | North of the Yellow River | North of the Yellow River             | Huairou, Beijing   |
| RISF-147   | 1                             | North of the Yellow River | North of the Yellow River             | Changping, Beijing |
| RISF-148   | 1                             | North of the Yellow River | North of the Yellow River             | Huairou, Beijing   |
| RISF-150   | 1                             | North of the Yellow River | North of the Yellow River             | Huairou, Beijing   |
| RISF-151   | 1                             | North of the Yellow River | North of the Yellow River             | Huairou, Beijing   |
| RISF-1     | 1                             | Eastern Coastal region    | North of the Yellow River             | Guangde, Anhui     |
| RISF-51    | 1                             | Eastern Coastal region    | North of the Yellow River             | Yixing, Jiangsu    |
| RISF-52    | 1                             | Eastern Coastal region    | North of the Yellow River             | Haiyang, Shandong  |
| RISF-56    | 1                             | Eastern Coastal region    | North of the Yellow River             | Junan, Shandong    |
| RISF-57    | 1                             | Eastern Coastal region    | North of the Yellow River             | Junan, Shandong    |

|          |   |                            |                           |                    |
|----------|---|----------------------------|---------------------------|--------------------|
| RISF-58  | 1 | Eastern Coastal region     | North of the Yellow River | Junan, Shandong    |
| RISF-59  | 1 | Eastern Coastal region     | North of the Yellow River | Junan, Shandong    |
| RISF-61  | 1 | Eastern Coastal region     | North of the Yellow River | Laixi, Shandong    |
| RISF-68  | 1 | Eastern Coastal region     | North of the Yellow River | Rushan, Shandong   |
| RISF-71  | 1 | Eastern Coastal region     | North of the Yellow River | Tai'an, Shandong   |
| RISF-73  | 1 | Eastern Coastal region     | North of the Yellow River | Tai'an, Shandong   |
| RISF-74  | 1 | Eastern Coastal region     | North of the Yellow River | Tai'an, Shandong   |
| RISF-78  | 1 | Eastern Coastal region     | North of the Yellow River | Tai'an, Shandong   |
| RISF-79  | 1 | Eastern Coastal region     | North of the Yellow River | Tai'an, Shandong   |
| RISF-80  | 1 | Eastern Coastal region     | North of the Yellow River | Tai'an, Shandong   |
| RISF-81  | 1 | Eastern Coastal region     | North of the Yellow River | Tai'an, Shandong   |
| RISF-82  | 1 | Eastern Coastal region     | North of the Yellow River | Tai'an, Shandong   |
| RISF-84  | 1 | Eastern Coastal region     | North of the Yellow River | Tancheng, Shandong |
| RISF-85  | 1 | Eastern Coastal region     | North of the Yellow River | Tancheng, Shandong |
| RISF-87  | 1 | Eastern Coastal region     | North of the Yellow River | Yantai, Shandong   |
| RISF-88  | 1 | Eastern Coastal region     | North of the Yellow River | Yantai, Shandong   |
| RISF-89  | 1 | Eastern Coastal region     | North of the Yellow River | Zhaoyuan, Shandong |
| RISF-101 | 1 | Eastern Coastal region     | North of the Yellow River | Xinyi, Jiangsu     |
| RISF-116 | 1 | Eastern Coastal region     | North of the Yellow River | Jiande, Zhejiang   |
| RISF-131 | 1 | Eastern Coastal region     | North of the Yellow River | Tai'an, Shandong   |
| RISF-132 | 1 | Eastern Coastal region     | North of the Yellow River | Tai'an, Shandong   |
| RISF-137 | 1 | Eastern Coastal region     | North of the Yellow River | Rizhao, Shandong   |
| RISF-31  | 1 | Yangtze River Basin region | North of the Yellow River | Jingshan, Hubei    |
| RISF-32  | 1 | Yangtze River Basin region | North of the Yellow River | Jingshan, Hubei    |
| RISF-36  | 1 | Yangtze River Basin region | North of the Yellow River | Luotian, Hubei     |
| RISF-111 | 1 | Yangtze River Basin region | North of the Yellow River | Shucheng, Anhui    |
| RISF-167 | 1 | Yangtze River Basin region | North of the Yellow River | Luotian, Hubei     |
| RISF-40  | 1 | South Central region       | North of the Yellow River | Shaoyang, Hunan    |
| RISF-110 | 1 | South Central region       | North of the Yellow River | Heyuan, Guangdong  |
| RISF-126 | 1 | South Central region       | North of the Yellow River | Liuyang, Hunan     |
| RISF-145 | 1 | South Central region       | North of the Yellow River | Eshan, Yunnan      |
| RISF-28  | 1 | Midwest region             | North of the Yellow River | Luoshan, Henan     |
| RISF-92  | 1 | Midwest region             | North of the Yellow River | Chang'an, Shaanxi  |
| RISF-170 | 1 | Midwest region             | North of the Yellow River | Chang'an, Shaanxi  |
| RISF-8   | 2 | North of the Yellow River  | South of the Yellow River | Changping, Beijing |
| RISF-9   | 2 | North of the Yellow River  | South of the Yellow River | Changping, Beijing |
| RISF-16  | 2 | North of the Yellow River  | South of the Yellow River | Changli, Hebei     |
| RISF-20  | 2 | North of the Yellow River  | South of the Yellow River | Qianxi, Hebei      |
| RISF-24  | 2 | North of the Yellow River  | South of the Yellow River | Zunhua, Hebei      |
| RISF-25  | 2 | North of the Yellow River  | South of the Yellow River | Zunhua, Hebei      |
| RISF-63  | 2 | North of the Yellow River  | South of the Yellow River | Linqing, Shandong  |
| RISF-107 | 2 | North of the Yellow River  | South of the Yellow River | Luan County, Hebei |
| RISF-112 | 2 | North of the Yellow River  | South of the Yellow River | Zunhua, Hebei      |
| RISF-115 | 2 | North of the Yellow River  | South of the Yellow River | Changping, Beijing |
| RISF-149 | 2 | North of the Yellow River  | South of the Yellow River | Huairou, Beijing   |
| RISF-2   | 2 | Eastern Coastal region     | South of the Yellow River | Guangde, Anhui     |
| RISF-3   | 2 | Eastern Coastal region     | South of the Yellow River | Ningguo, Anhui     |
| RISF-41  | 2 | Eastern Coastal region     | South of the Yellow River | Pizhou, Jiangsu    |

|          |   |                        |                           |                     |
|----------|---|------------------------|---------------------------|---------------------|
| RISF-42  | 2 | Eastern Coastal region | South of the Yellow River | Wu County, Jiangsu  |
| RISF-43  | 2 | Eastern Coastal region | South of the Yellow River | Xinyi, Jiangsu      |
| RISF-44  | 2 | Eastern Coastal region | South of the Yellow River | Xinyi, Jiangsu      |
| RISF-45  | 2 | Eastern Coastal region | South of the Yellow River | Yixing, Jiangsu     |
| RISF-46  | 2 | Eastern Coastal region | South of the Yellow River | Yixing, Jiangsu     |
| RISF-47  | 2 | Eastern Coastal region | South of the Yellow River | Yixing, Jiangsu     |
| RISF-48  | 2 | Eastern Coastal region | South of the Yellow River | Yixing, Jiangsu     |
| RISF-49  | 2 | Eastern Coastal region | South of the Yellow River | Yixing, Jiangsu     |
| RISF-50  | 2 | Eastern Coastal region | South of the Yellow River | Yixing, Jiangsu     |
| RISF-53  | 2 | Eastern Coastal region | South of the Yellow River | Haiyang, Shandong   |
| RISF-54  | 2 | Eastern Coastal region | South of the Yellow River | Haiyang, Shandong   |
| RISF-55  | 2 | Eastern Coastal region | South of the Yellow River | Junan, Shandong     |
| RISF-60  | 2 | Eastern Coastal region | South of the Yellow River | Junan, Shandong     |
| RISF-62  | 2 | Eastern Coastal region | South of the Yellow River | Laixi, Shandong     |
| RISF-64  | 2 | Eastern Coastal region | South of the Yellow River | Linyi, Shandong     |
| RISF-65  | 2 | Eastern Coastal region | South of the Yellow River | Linyi, Shandong     |
| RISF-66  | 2 | Eastern Coastal region | South of the Yellow River | Linyi, Shandong     |
| RISF-67  | 2 | Eastern Coastal region | South of the Yellow River | Linyi, Shandong     |
| RISF-69  | 2 | Eastern Coastal region | South of the Yellow River | Rushan, Shandong    |
| RISF-70  | 2 | Eastern Coastal region | South of the Yellow River | Tai'an, Shandong    |
| RISF-72  | 2 | Eastern Coastal region | South of the Yellow River | Tai'an, Shandong    |
| RISF-75  | 2 | Eastern Coastal region | South of the Yellow River | Tai'an, Shandong    |
| RISF-76  | 2 | Eastern Coastal region | South of the Yellow River | Tai'an, Shandong    |
| RISF-77  | 2 | Eastern Coastal region | South of the Yellow River | Tai'an, Shandong    |
| RISF-83  | 2 | Eastern Coastal region | South of the Yellow River | Tai'an, Shandong    |
| RISF-86  | 2 | Eastern Coastal region | South of the Yellow River | Tancheng, Shandong  |
| RISF-94  | 2 | Eastern Coastal region | South of the Yellow River | Shangyu, Zhejiang   |
| RISF-95  | 2 | Eastern Coastal region | South of the Yellow River | Shangyu, Zhejiang   |
| RISF-96  | 2 | Eastern Coastal region | South of the Yellow River | Shangyu, Zhejiang   |
| RISF-98  | 2 | Eastern Coastal region | South of the Yellow River | Laixi, Shandong     |
| RISF-99  | 2 | Eastern Coastal region | South of the Yellow River | Xintai, Shandong    |
| RISF-100 | 2 | Eastern Coastal region | South of the Yellow River | Changxing, Zhejiang |
| RISF-102 | 2 | Eastern Coastal region | South of the Yellow River | Zhuji, Zhejiang     |
| RISF-103 | 2 | Eastern Coastal region | South of the Yellow River | Yixing, Jiangsu     |
| RISF-104 | 2 | Eastern Coastal region | South of the Yellow River | Minhang, Shanghai   |
| RISF-105 | 2 | Eastern Coastal region | South of the Yellow River | Zhaoyuan, Shandong  |
| RISF-108 | 2 | Eastern Coastal region | South of the Yellow River | Xuancheng, Anhui    |
| RISF-113 | 2 | Eastern Coastal region | South of the Yellow River | Tai'an, Shandong    |
| RISF-122 | 2 | Eastern Coastal region | South of the Yellow River | Yixing, Jiangsu     |
| RISF-153 | 2 | Eastern Coastal region | South of the Yellow River | Guangde, Anhui      |
| RISF-156 | 2 | Eastern Coastal region | South of the Yellow River | Pan'an, Zhejiang    |
| RISF-157 | 2 | Eastern Coastal region | South of the Yellow River | Pan'an, Zhejiang    |
| RISF-158 | 2 | Eastern Coastal region | South of the Yellow River | Ningguo, Anhui      |
| RISF-159 | 2 | Eastern Coastal region | South of the Yellow River | Guangde, Anhui      |
| RISF-163 | 2 | Eastern Coastal region | South of the Yellow River | Guangde, Anhui      |
| RISF-164 | 2 | Eastern Coastal region | South of the Yellow River | Qufu, Shandong      |
| RISF-166 | 2 | Eastern Coastal region | South of the Yellow River | Liyang, Jiangsu     |
| RISF-171 | 2 | Eastern Coastal region | South of the Yellow River | Wuyi, Zhejiang      |

|          |   |                            |                           |                     |
|----------|---|----------------------------|---------------------------|---------------------|
| RISF-172 | 2 | Eastern Coastal region     | South of the Yellow River | Wu County, Jiangsu  |
| RISF-173 | 2 | Eastern Coastal region     | South of the Yellow River | Shaoxing, Zhejiang  |
| RISF-174 | 2 | Eastern Coastal region     | South of the Yellow River | Wuyi, Zhejiang      |
| RISF-175 | 2 | Eastern Coastal region     | South of the Yellow River | Wuyi, Zhejiang      |
| RISF-176 | 2 | Eastern Coastal region     | South of the Yellow River | Yongjia, Zhejiang   |
| RISF-177 | 2 | Eastern Coastal region     | South of the Yellow River | Yongjia, Zhejiang   |
| RISF-178 | 2 | Eastern Coastal region     | South of the Yellow River | Tiantai, Zhejiang   |
| RISF-179 | 2 | Eastern Coastal region     | South of the Yellow River | Jiangshan, Zhejiang |
| RISF-180 | 2 | Eastern Coastal region     | South of the Yellow River | Lanxi, Zhejiang     |
| RISF-183 | 2 | Eastern Coastal region     | South of the Yellow River | Songyang, Zhejiang  |
| RISF-184 | 2 | Eastern Coastal region     | South of the Yellow River | Pan'an, Zhejiang    |
| RISF-185 | 2 | Eastern Coastal region     | South of the Yellow River | Pan'an, Zhejiang    |
| RISF-4   | 2 | Yangtze River Basin region | South of the Yellow River | Shucheng, Anhui     |
| RISF-5   | 2 | Yangtze River Basin region | South of the Yellow River | Shucheng, Anhui     |
| RISF-6   | 2 | Yangtze River Basin region | South of the Yellow River | Shucheng, Anhui     |
| RISF-7   | 2 | Yangtze River Basin region | South of the Yellow River | Shucheng, Anhui     |
| RISF-33  | 2 | Yangtze River Basin region | South of the Yellow River | Jingshan, Hubei     |
| RISF-34  | 2 | Yangtze River Basin region | South of the Yellow River | Luotian, Hubei      |
| RISF-35  | 2 | Yangtze River Basin region | South of the Yellow River | Luotian, Hubei      |
| RISF-37  | 2 | Yangtze River Basin region | South of the Yellow River | Luotian, Hubei      |
| RISF-97  | 2 | Yangtze River Basin region | South of the Yellow River | Luotian, Hubei      |
| RISF-109 | 2 | Yangtze River Basin region | South of the Yellow River | Huanggang, Hubei    |
| RISF-154 | 2 | Yangtze River Basin region | South of the Yellow River | Dongzhi, Anhui      |
| RISF-155 | 2 | Yangtze River Basin region | South of the Yellow River | Shucheng, Anhui     |
| RISF-160 | 2 | Yangtze River Basin region | South of the Yellow River | Jinzhai, Anhui      |
| RISF-161 | 2 | Yangtze River Basin region | South of the Yellow River | Jinzhai, Anhui      |
| RISF-168 | 2 | Yangtze River Basin region | South of the Yellow River | Luotian, Hubei      |
| RISF-181 | 2 | Yangtze River Basin region | South of the Yellow River | Luotian, Hubei      |
| RISF-182 | 2 | Yangtze River Basin region | South of the Yellow River | Luotian, Hubei      |
| RISF-38  | 2 | South Central region       | South of the Yellow River | Shaoyang, Hunan     |
| RISF-39  | 2 | South Central region       | South of the Yellow River | Rucheng, Hunan      |
| RISF-106 | 2 | South Central region       | South of the Yellow River | Yangshuo, Guangxi   |
| RISF-114 | 2 | South Central region       | South of the Yellow River | Xiangtan, Hunan     |
| RISF-117 | 2 | South Central region       | South of the Yellow River | Xiangtan, Hunan     |
| RISF-118 | 2 | South Central region       | South of the Yellow River | Changsha, Hunan     |
| RISF-119 | 2 | South Central region       | South of the Yellow River | Changsha, Hunan     |
| RISF-120 | 2 | South Central region       | South of the Yellow River | Xintian, Hunan      |
| RISF-121 | 2 | South Central region       | South of the Yellow River | Liuzhou, Guangxi    |
| RISF-123 | 2 | South Central region       | South of the Yellow River | Liuyang, Hunan      |
| RISF-124 | 2 | South Central region       | South of the Yellow River | Liuyang, Hunan      |
| RISF-125 | 2 | South Central region       | South of the Yellow River | Chengbu, Hunan      |
| RISF-127 | 2 | South Central region       | South of the Yellow River | Shimen, Hunan       |
| RISF-142 | 2 | South Central region       | South of the Yellow River | Yiliang, Yunnan     |
| RISF-143 | 2 | South Central region       | South of the Yellow River | Yiliang, Yunnan     |
| RISF-144 | 2 | South Central region       | South of the Yellow River | Yiliang, Yunnan     |
| RISF-152 | 2 | South Central region       | South of the Yellow River | Jingzhou, Hunan     |
| RISF-162 | 2 | South Central region       | South of the Yellow River | Wugang, Hunan       |
| RISF-165 | 2 | South Central region       | South of the Yellow River | Shaoyang, Hunan     |

|          |   |                      |                           |                   |
|----------|---|----------------------|---------------------------|-------------------|
| RISF-169 | 2 | South Central region | South of the Yellow River | Yangshuo, Guangxi |
| RISF-26  | 2 | Midwest region       | South of the Yellow River | Luoshan, Henan    |
| RISF-27  | 2 | Midwest region       | South of the Yellow River | Luoshan, Henan    |
| RISF-29  | 2 | Midwest region       | South of the Yellow River | Luoshan, Henan    |
| RISF-30  | 2 | Midwest region       | South of the Yellow River | Luoshan, Henan    |
| RISF-90  | 2 | Midwest region       | South of the Yellow River | Zhashui, Shaanxi  |
| RISF-91  | 2 | Midwest region       | South of the Yellow River | Zhashui, Shaanxi  |
| RISF-93  | 2 | Midwest region       | South of the Yellow River | Chang'an, Shaanxi |

*Supplementary Table S2. Outliers of phylogenetic tree analysis.*

**Table S2.** Outliers of the phylogenetic analysis.

| Sample No. | Origin   |
|------------|----------|
| RISF-149   | Beijing  |
| RISF-72    | Shandong |
| RISF-24    | Hebei    |
| RISF-79    | Shandong |
| RISF-82    | Shandong |
| RISF-58    | Shandong |
| RISF-28    | Henan    |
| RISF-101   | Jiangsu  |
| RISF-52    | Shandong |
| RISF-128   | Beijing  |
| RISF-61    | Shandong |
| RISF-150   | Beijing  |
| RISF-92    | Shaanxi  |
| RISF-170   | Shaanxi  |
| RISF-84    | Shandong |
| RISF-1     | Anhui    |
| RISF-57    | Shandong |

**Supplement figure (S1):**

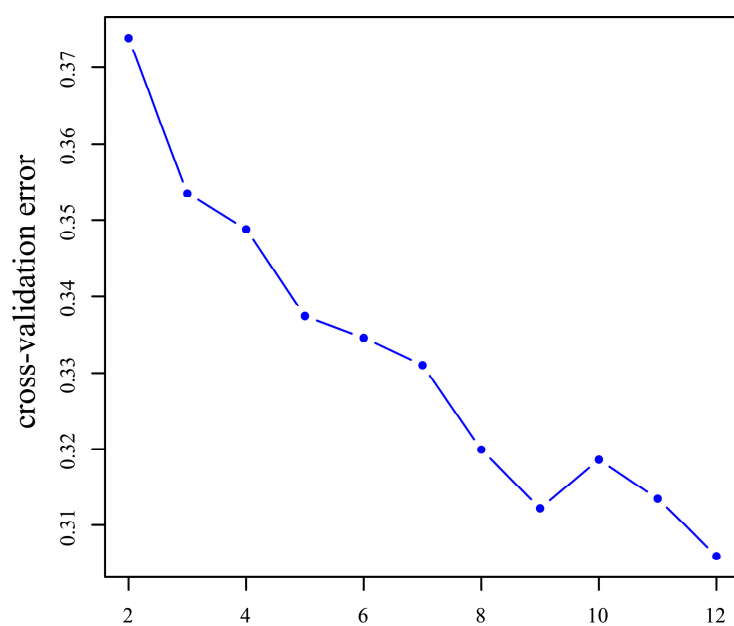

**Figure S1.** K values in the ADMIXTURE analysis of 185 Chinese chestnut landraces.
